# Supplementary material
Source: Research Square preprint supplement (doi:10.21203/rs.3.rs-9130472/v1)
Supplement: Supplementary file 1 [file 9c7b0a40879b5be06544640d.docx]

***Supplementary File 1***

***Study Questionnaire:* From Knowledge to Care: Hemoglobinopathy Awareness and Health-Seeking Behaviour among selected Scheduled Tribes in Tamil Nadu**

Developed by the authors based on literature review.

**SECTION A: Awareness of Hemoglobinopathies**

1. Have you heard of hemoglobin-related disorders such as sickle cell disease or thalassemia?

a) Yes

b) No

2. If yes, what was your source of information?

a) Healthcare professional

b) Family/Friends

c) Media/Newspaper

d) Not sure

3. What do you think is the cause of hemoglobin-related disorders?

a) Natural causes

b) Inherited from parents

c) Not sure

d) Do not know

4. Have you ever been diagnosed with sickle cell disease, thalassemia, or any other blood disorder?

a) Yes

b) No

5. Has anyone in your family been diagnosed with a hemoglobin disorder?

a) Yes

b) No

c) Not sure

d) Do not know

**SECTION B: Health-Seeking Behaviour (Individual Level)**

1. How would you rate your overall health status?

a) Excellent

b) Very good

c) Good

d) Fair

2. Is there a healthcare facility available near your residence?

a) Yes

b) No

3. If yes:

3.1. Type of facility:

a) Primary Health Center/Sub-center

b) Government hospital

c) Private clinic/hospital

3.2. Distance to facility:

a) <5 km

b) 5-10 km

c) >10 km

4. Are you able to access the facility easily?

a) Yes

b) No

5. When do you usually seek healthcare?

1. When I am not well, even with the slightest discomfort
2. When I am not well, with a moderate level of discomfort
3. Only when I am completely bed-ridden, with an inability to perform my day-to-day activities
4. Not sure

6. Who decides to seek healthcare when you are sick?

a) Yourself

b) Family members, other than yourself

c) Both you and family members

d) Not sure

7. What action did you take during your most recent illness?

a) Visited healthcare facility

b) Used traditional/home remedies

c) Sought advice from a person with medical knowledge

d) Not sure/cannot recall

***Treatment-Seeking Behaviour of those affected by Hemoglobinopathies (Individual-Level)***

8. If you are affected by Hemoglobinopathies:

8.1. Where was it diagnosed?

a) Government facility (PHC/GH)

b) NGO/Private facility

8.2. Did you undergo blood transfusion?

a) Yes

b) No

8.3. Did you receive treatment?

a) Yes

b) No

9. If yes, where was the treatment taken?

a) Government facility

b) Private hospital

c) NGO/Tribal care hospital

**SECTION C: Health-Seeking Behaviour (Female participants and Pregnant Women)**

1. Have you heard of prenatal genetic screening/testing?

a) Yes

b) No

c) Not sure

2. Are you currently pregnant?

a) Yes

b) No

3. Is this your first pregnancy?

a) Yes

b) No

4. Have you undergone prenatal genetic screening/testing?

a) Yes

b) No

5. If yes:

5.1. Where was the test done? ___________

5.2. Who recommended the test? ___________

6. Why is genetic screening important during pregnancy?

a) To rule out inherited disorders

b) To assess maternal health

c) Do not know

**SECTION D: Health-Seeking Behaviour (Family Members)**

1. Who decides to seek healthcare when a family member is sick?

a) Self

b) Family members

c) Joint decision

d) Not sure

2. What action is taken when a family member is sick?

a) Visit healthcare facility

b) Use traditional remedies

c) Combination of both a) & b)

d) Seek advice from a person with medical knowledge

e) Not sure

3. What barriers do you face while seeking care for family members?

a) No barriers

b) Difficulty convincing patient

c) Lack of accompaniment

d) Financial constraints

e) Multiple barriers: convincing, accompaniment, financial constraints

f) Not sure

***Treatment Seeking Behaviour (When Family Member(s) affected by Hemoglobinopathies)***

4. If your family member(s) is/are affected by Hemoglobinopathies:

4.1. Who was affected?

a) Immediate family member

b) Cousins/relatives

4.2. Where was the diagnosis made?

a) Hospital (Government/Private)

b) Primary Health Centre

c) Tribal village medical camps

4.3. Did they undergo blood transfusion?

a) Yes

b) No

4.4. Did they receive treatment?

a) Yes

b) No

4.5. Where was treatment taken?

a) Government facility

b) Private hospital
